# Supplementary material
Source: MDPI journal article supplement (https://www.mdpi.com/2813-0464/2/1/7)
Supplement: s1 [file s1]

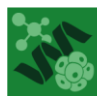

# Biochar Extracts Can Modulate the Toxicity of Persistent Free Radicals in the Nematode *Caenorhabditis elegans*

Xuchao Zhang <sup>1,2</sup>, Nadine Saul <sup>3,4</sup>, Thora Lieke <sup>3,5,6</sup>, Yi Chen <sup>1</sup>, Min Wu <sup>1,\*</sup>, Bo Pan <sup>1</sup> and Christian E. W. Steinberg <sup>1,3,\*</sup>

<sup>1</sup> Yunnan Provincial Key Lab of Soil Carbon Sequestration and Pollution Control, Faculty of Environmental Science and Engineering, Kunming University of Science and Technology, Kunming 650500, China

<sup>2</sup> Faculty of Life Sciences, Ecology Group, Humboldt Universität zu Berlin, Philippstraße 13, 10115 Berlin, Germany

<sup>3</sup> Faculty of Life Sciences, Freshwater and Stress Ecology Group, Humboldt Universität zu Berlin, 12437 Berlin, Germany

<sup>4</sup> Faculty of Life Sciences, Molecular Genetics Group, Humboldt Universität zu Berlin, 10115 Berlin, Germany

<sup>5</sup> Institute of Aquaculture and Protection of Waters, South Bohemian Research Center of Aquaculture and Biodiversity of Hydrocenoses, Faculty of Fisheries and Protection of Waters, University of South Bohemia in Ceske Budejovice, Na Sádkách 1780, 370 05 České Budějovice, Czech Republic

<sup>6</sup> Institute of Parasitology, Biology Centre of the Czech Academy of Sciences, 370 05 Ceske Budejovice, Czech Republic

\* Correspondence: minwup@kust.edu.cn (M.W.); christian\_ew\_steinberg@web.de (C.E.W.S.); Tel.: 86-871-6510-2829 (M.W.); Tel.: 49-30-614-2746 (C.E.W.S.)

**Text S1. Media and buffer.** In order to maintain pH balance, the exposure medium was prepared by adding M9 buffer to K-medium, then mixed well with OP50 just before the exposure experiments, with a volume ratio of K medium: M9 Buffer: OP50 = 3:3:1. K-medium: 2.36 g potassium chloride (KCl), 3 g sodium chloride (NaCl), in 1 L double-distilled H<sub>2</sub>O (ddH<sub>2</sub>O). M9 buffer: 3 g potassium dihydrogen phosphate (KH<sub>2</sub>PO<sub>4</sub>), 7.5 g disodium phosphate (Na<sub>2</sub>HPO<sub>4</sub>), 5 g NaCl, in 1 L ddH<sub>2</sub>O.

**Test S2. 96 mm-chemotaxis-assay plates.** To test the attraction of NaCl, chemotaxis agars were prepared without adding NaCl. Add 10 g agar and 2.3 mL of 1 M potassium phosphate buffer in the bottle, fill up to 500 mL with the ddH<sub>2</sub>O. After sterilization, mix 0.5 mL of 1 M calcium chloride (CaCl<sub>2</sub>) and 0.5 mL of 1 M magnesium sulfate (MgSO<sub>4</sub>), then distribute in 96 mm Petri dishes.

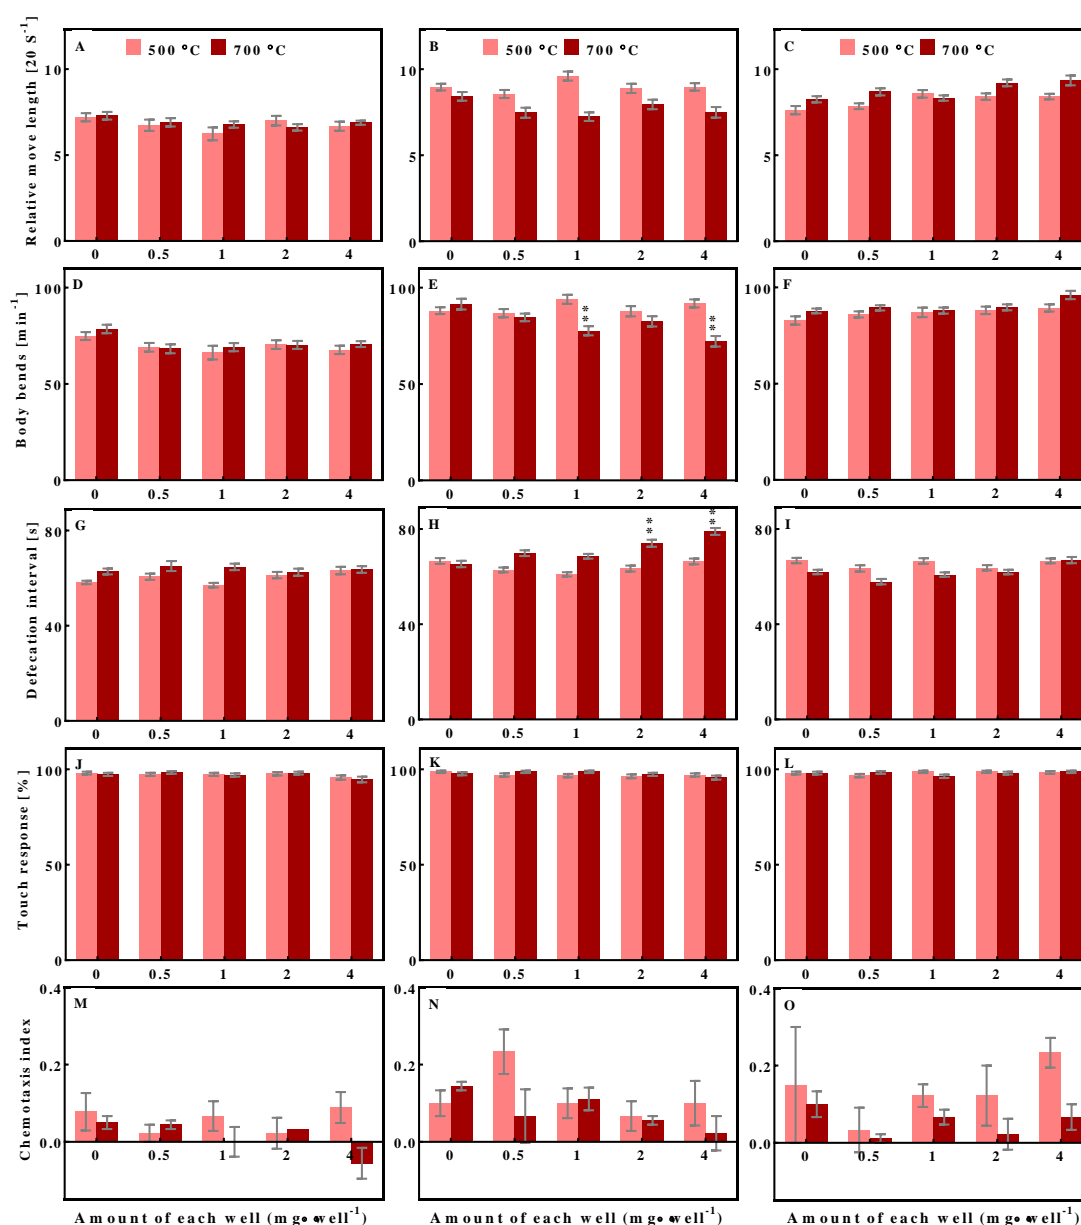

**Figure S1.** Neurobehavior of *C. elegans* after 24h exposure to unwashed biochars (A, D, G, J, and M), washed biochar particles (B, E, H, K, and N, these data were copied from Figure 2A–2E for a better comparison), and supernatants (C, F, I, L, and O) at 20 °C. Relative move length (A, B, and C), body bend (D, E, and F), defecation interval (G, H, and I), touch response (J, K, and L), and chemotaxis index (M, N, and O) were determined. \*  $p < 0.05$ , \*\*  $p < 0.01$ .

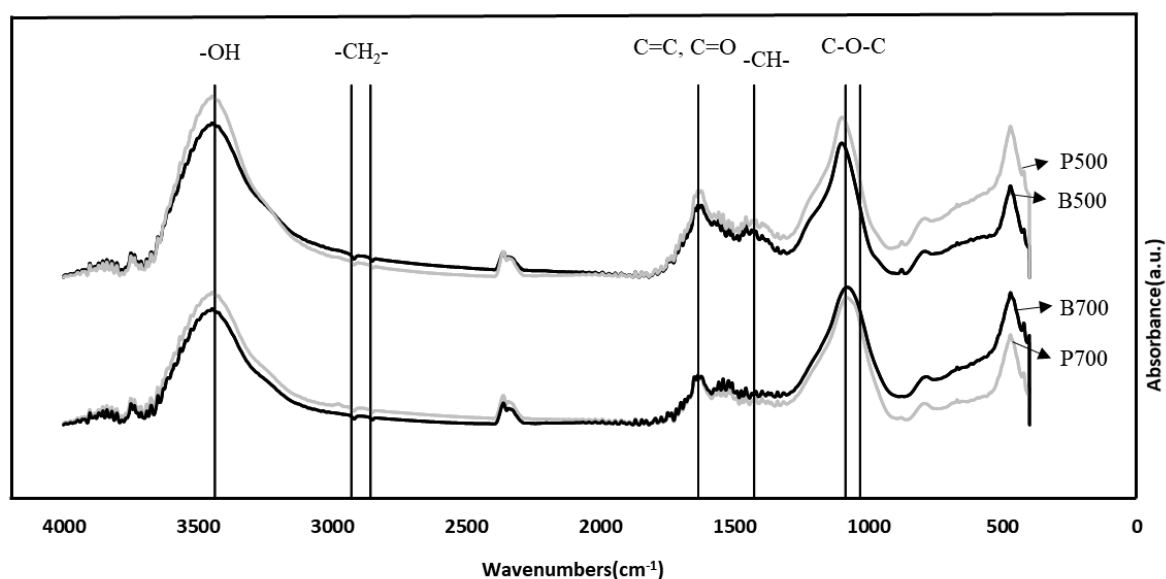

**Figure S2.** Fourier transform infrared (FTIR) spectra of unwashed biochar and washed biochar. Samples were prepared with potassium bromide (mass ratio =1:1500) and detected by ThermoFisher spectrometer (NICOLET iS50 FT-IR, USA). The dark line means unwashed biochar, the grey line means washed biochar particles.

**Table S1.** Total of carbon concentration in the supernatant.

| TOC                | S500   | S700  |
|--------------------|--------|-------|
| mg·L <sup>-1</sup> | 143.76 | 66.80 |

Note: 40 mg of biochar was added in 15 mL sterile water and shaken for 24 h at 20°C. The total carbon in the liquid phases was detected by TOC Analyzer (vario TOC cube, Elementar Analysensystem, Germany).

**Table S2.** The elemental composition in unwashed biochar and washed biochar.

| %       | C     | H    | O     | N    | S    | H/C  | O/C  | (N + O) /C |
|---------|-------|------|-------|------|------|------|------|------------|
| biomass | 37.42 | 5.58 | 34.82 | 0.65 | 0.00 | 1.79 | 0.70 | 0.71       |
| B500    | 33.53 | 1.89 | 16.37 | 0.83 | 0.75 | 0.68 | 0.37 | 0.39       |
| B700    | 24.33 | 1.20 | 13.95 | 0.50 | 0.88 | 0.59 | 0.43 | 0.45       |
| P500    | 36.66 | 2.13 | 20.61 | 0.92 | 0.00 | 0.70 | 0.42 | 0.44       |
| P700    | 27.37 | 1.39 | 16.62 | 0.57 | 0.09 | 0.61 | 0.46 | 0.47       |

Note: The elemental composition was determined by CHNOS Elemental Analyzer (vario MICRO, Elementar Analysensystem, Germany).
